# Supplementary material
Source: MDPI journal article supplement (https://www.mdpi.com/2073-4352/12/5/671)
Supplement: s1 [file s1]

# XFEL: Crystal Blaster Game Assessment

---

\* Required

## About You

Tell us a little about yourself...

1. What grade are you in this school year? \*

---

2. What is your gender? \*

*Mark only one oval.*

- ☐ Male
- ☐ Female
- ☐ Nonbinary
- ☐ Don't want to answer
- ☐ Other: 

---

3. What school do you go to? \*

---

4. How do you feel about learning science at school? \*

*Mark only one oval.*

- ☐ I like learning science in my science class most of the time.
- ☐ I like learning science in my science class some of the time.
- ☐ I don't usually like learning science at school
- ☐ I don't like science at school.

5. How do you feel about learning about science outside of school? For example, watching the Discovery channel or doing experiments on your own. \*

*Mark only one oval.*

- ☐ I like learning science outside of school time.
- ☐ I don't take time to learn about science outside of school time.
- ☐ I'm not interested in learning science, even outside of school time.

Educational Value

How much did you learn by playing this game...

6. Did you read the text in the game? \*

*Mark only one oval.*

- ☐ Yes, I read all of it.
- ☐ I read some, but not all of it.
- ☐ No, I did not read any of the text.

7. Before playing this game, how much did you know about the field of X-ray crystallography? \*

*Mark only one oval.*

- ☐ I knew a lot about the field of crystallography.
- ☐ I had heard of the field of crystallography.
- ☐ I had never heard of the crystallography.

8. Before playing this game, did you know about proteins or have you seen a protein structure like this one? \*

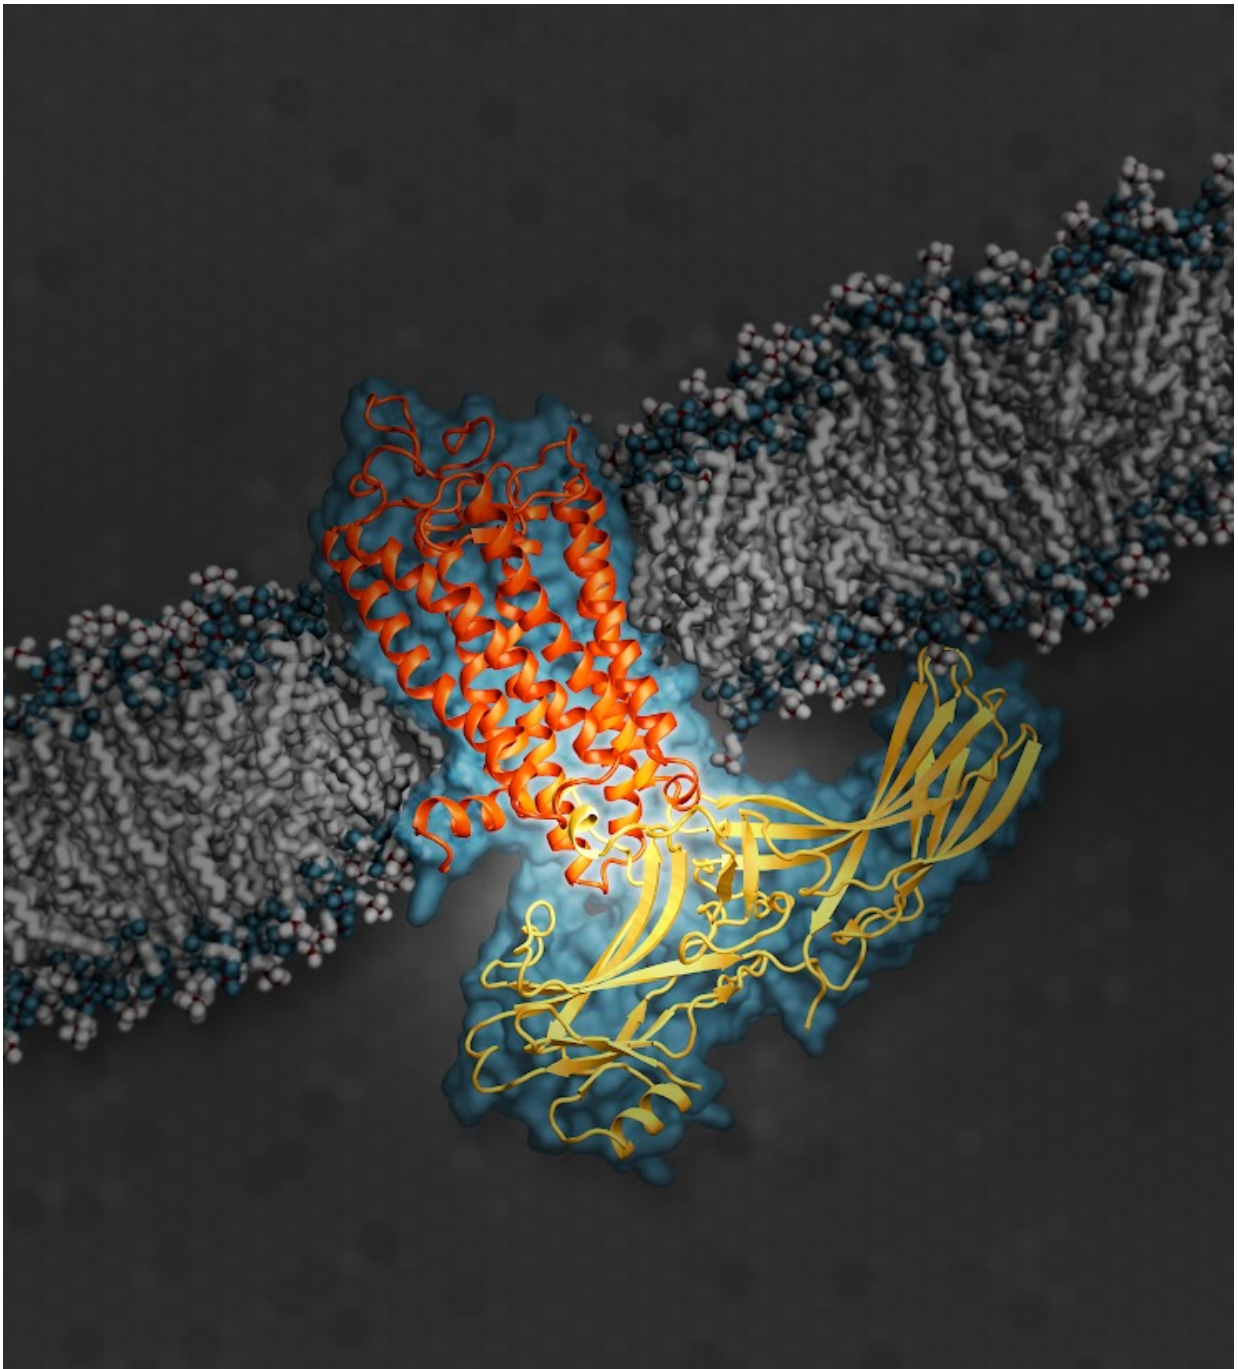

Mark only one oval.

☐ Yes

☐ No

9. Was the content of the game appropriate for your level of understanding? \*

*Mark only one oval.*

- ☐ No, it was too simple
- ☐ Yes, it was appropriate
- ☐ No, it was too difficult for me to understand

10. How would you rate this game at teaching about XFELs and X-ray crystallography? \*

*Mark only one oval.*

- ☐ It was very effective as an introduction to the field.
- ☐ It was somewhat effective as an introduction to the field.
- ☐ It was not an effective introduction to the field.

11. Did this game increase your interest in learning more about the field of X-ray crystallography? \*

*Mark only one oval.*

- ☐ Yes
- ☐ No
- ☐ Maybe

12. Do you have any comments or suggestions on the material presented through the game?

---

---

---

---

---

## Game play

How did you like the game?

13. How difficult was this game for you? \*

Mark only one oval.

|          |                       |                       |                       |                       |                       |                       |                       |                       |                       |                       |               |
|----------|-----------------------|-----------------------|-----------------------|-----------------------|-----------------------|-----------------------|-----------------------|-----------------------|-----------------------|-----------------------|---------------|
|          | 1                     | 2                     | 3                     | 4                     | 5                     | 6                     | 7                     | 8                     | 9                     | 10                    |               |
| Too easy | <input type="radio"/> | Too difficult |

14. Do you have any suggestions on how to improve the game?

---

---

---

---

---

15. Do you plan to share this game with others?

Mark only one oval.

☐ Yes

☐ No

☐ Other: \_\_\_\_\_

This content is neither created nor endorsed by Google.

Google Forms
